# Supplementary material for: Association between COPD and Stage of Lung Cancer Diagnosis: A Population-Based Study
Source: MDPI journal article supplement (doi:10.3390/curroncol30070471), 2023-07-05
Supplement: s1 [file s1]

**Association between COPD and stage of lung cancer diagnosis: A population-based study**  
Butler SJ, Louie AV, Sutradhar R, Paszat L, Brooks D, Gershon AS.

**Online Supplement**

**Table S1:** Lung Cancer Morphology Codes

| Type of Lung Cancer                       | Morphology Codes                                                                                                                                                       |
|-------------------------------------------|------------------------------------------------------------------------------------------------------------------------------------------------------------------------|
| <u>Non-small cell lung cancer (NSCLC)</u> |                                                                                                                                                                        |
| Adenocarcinoma                            | 80503, 80523, 81303, 81403, 81406, 82503, 82513, 82523, 82533, 82543, 82553, 82563, 82573, 82603, 82653, 84803, 84813, 85503, 85513, 85713, 85723, 85743, 85753, 85763 |
| Squamous cell carcinoma                   | 80703, 80713, 80723, 80733, 80743, 80763, 80833, 80843                                                                                                                 |
| Large cell carcinoma                      | 80033, 80043, 80123, 80133, 80143, 80303, 80313, 80323, 80343, 80353, 82463                                                                                            |
| Adenosquamous                             | 85603, 85623                                                                                                                                                           |
| Not Otherwise Specified                   | 80103, 80203, 80463, 81233                                                                                                                                             |
| Small cell lung cancer (SCLC)             | 80023, 80413, 80423, 80443, 80453                                                                                                                                      |
| Unspecified                               | 80003, 80013, 82303                                                                                                                                                    |

**Table S2:** Balance in characteristics of individuals with previously diagnosed COPD and without COPD prior to and after inverse propensity score weighting (IPW)

|                                                    | Unweighted                              |                       |       | Weighted                  |             |       |
|----------------------------------------------------|-----------------------------------------|-----------------------|-------|---------------------------|-------------|-------|
|                                                    | Previously diagnosed COPD<br>(n=38,894) | No COPD<br>(n=39,098) | SMD   | Previously diagnosed COPD | No COPD     | SMD   |
| <b><u>Demographics</u></b>                         |                                         |                       |       |                           |             |       |
| Age, mean (SD)                                     | 71.9 (9.4)                              | 68.9 (11.3)           | 0.284 | 70.7 (9.5)                | 70.6 (11.3) | 0.012 |
| Sex, % male                                        | 51.5%                                   | 51.0%                 | 0.010 | 51.7%                     | 51.5%       | 0.003 |
| <b><u>Rurality/Income Quintile</u></b>             |                                         |                       |       |                           |             |       |
| Rural                                              | 16.5%                                   | 13.8%                 | 0.077 | 15.2%                     | 15.0%       | 0.004 |
| Urban 1 (lowest)                                   | 23.3%                                   | 18.2%                 | 0.124 | 20.6%                     | 20.5%       | 0.002 |
| Urban 2                                            | 19.6%                                   | 18.8%                 | 0.020 | 19.4%                     | 19.4%       | 0.001 |
| Urban 3                                            | 15.8%                                   | 17.1%                 | 0.034 | 16.5%                     | 16.4%       | 0.001 |
| Urban 4                                            | 13.4%                                   | 16.5%                 | 0.087 | 14.8%                     | 15.0%       | 0.003 |
| Urban 5 (highest)                                  | 11.4%                                   | 15.6%                 | 0.125 | 13.5%                     | 13.6%       | 0.004 |
| <b><u>Immigration Category</u></b>                 |                                         |                       |       |                           |             |       |
| <= 10 years                                        | 0.4%                                    | 2.2%                  | 0.159 | 1.1%                      | 1.3%        | 0.012 |
| Long-term resident (> 10 years)                    | 2.7%                                    | 6.6%                  | 0.189 | 4.5%                      | 4.7%        | 0.005 |
| Non-immigrant                                      | 97.0%                                   | 91.2%                 | 0.244 | 94.3%                     | 94.1%       | 0.010 |
| <b><u>Type of Lung Cancer</u></b>                  |                                         |                       |       |                           |             |       |
| NSCLC: Adenocarcinoma                              | 35.5%                                   | 49.4%                 | 0.281 | 42.5%                     | 42.9%       | 0.007 |
| NSCLC: Squamous cell carcinoma                     | 21.9%                                   | 13.9%                 | 0.211 | 17.9%                     | 17.8%       | 0.003 |
| NSCLC: Large cell carcinoma                        | 2.4%                                    | 2.7%                  | 0.017 | 2.6%                      | 2.6%        | 0.003 |
| NSCLC: Adenosquamous                               | 0.5%                                    | 0.6%                  | 0.010 | 0.6%                      | 0.6%        | 0.003 |
| NSCLC: Not otherwise specified                     | 14.2%                                   | 14.2%                 | 0.001 | 14.1%                     | 14.1%       | 0.002 |
| SCLC                                               | 12.7%                                   | 10.4%                 | 0.072 | 11.5%                     | 11.4%       | 0.003 |
| Unspecified                                        | 12.7%                                   | 8.8%                  | 0.126 | 10.8%                     | 10.6%       | 0.005 |
| <b><u>Comorbidities</u></b>                        |                                         |                       |       |                           |             |       |
| Asthma                                             | 26.1%                                   | 7.9%                  | 0.485 | 16.9%                     | 16.2%       | 0.019 |
| Congestive heart failure                           | 17.7%                                   | 7.5%                  | 0.309 | 12.6%                     | 12.4%       | 0.006 |
| Dementia                                           | 5.5%                                    | 3.7%                  | 0.087 | 4.7%                      | 4.6%        | 0.001 |
| Diabetes                                           | 29.4%                                   | 24.8%                 | 0.105 | 27.3%                     | 26.9%       | 0.009 |
| Previous pneumonia                                 | 32.5%                                   | 18.5%                 | 0.321 | 25.4%                     | 25.0%       | 0.009 |
| Cancer in the previous 5 years                     | 8.7%                                    | 9.1%                  | 0.013 | 9.0%                      | 9.0%        | 0.003 |
| <b><u>Previous Healthcare Utilization</u></b>      |                                         |                       |       |                           |             |       |
| <b><u>Rate of primary care visits per year</u></b> |                                         |                       |       |                           |             |       |
| 5 or more                                          | 50.6%                                   | 34.0%                 | 0.337 | 42.4%                     | 42.0%       | 0.008 |
| Between 2 and 5                                    | 35.1%                                   | 38.1%                 | 0.064 | 36.8%                     | 36.9%       | 0.001 |
| 2 or less                                          | 12.6%                                   | 22.3%                 | 0.255 | 17.4%                     | 17.5%       | 0.001 |
| 0                                                  | 1.7%                                    | 5.6%                  | 0.208 | 3.3%                      | 3.6%        | 0.016 |
| Specialist care                                    | 49.7%                                   | 36.4%                 | 0.269 | 43.4%                     | 43.0%       | 0.009 |

Abbreviations: NSCLC = Non-small cell lung cancer, SCLC = small cell lung cancer, SMD = standardized mean difference, SD=standard deviation

**Table S3:** Balance in characteristics of individuals with undiagnosed COPD and without COPD prior to and after inverse propensity score weighting (IPW)

|                                                    | Unweighted                    |                       |       | Weighted         |             |       |
|----------------------------------------------------|-------------------------------|-----------------------|-------|------------------|-------------|-------|
|                                                    | Undiagnosed COPD<br>(n=8,843) | No COPD<br>(n=39,098) | SMD   | Undiagnosed COPD | No COPD     | SMD   |
| <b><u>Demographics</u></b>                         |                               |                       |       |                  |             |       |
| Age, mean (SD)                                     | 68.7 (9.9)                    | 68.9 (11.3)           | 0.019 | 68.9 (10.0)      | 68.9 (11.3) | 0.001 |
| Sex, % male                                        | 54.7%                         | 51.0%                 | 0.075 | 52.4%            | 51.7%       | 0.013 |
| <b><u>Rurality/Income Quintile</u></b>             |                               |                       |       |                  |             |       |
| Rural                                              | 15.5%                         | 13.8%                 | 0.051 | 14.2%            | 14.1%       | 0.002 |
| Urban 1 (lowest)                                   | 21.3%                         | 18.2%                 | 0.079 | 18.8%            | 18.8%       | 0.001 |
| Urban 2                                            | 20.3%                         | 18.8%                 | 0.037 | 19.1%            | 19.1%       | 0     |
| Urban 3                                            | 15.7%                         | 17.1%                 | 0.036 | 16.8%            | 16.8%       | 0     |
| Urban 4                                            | 14.4%                         | 16.5%                 | 0.058 | 16.0%            | 16.1%       | 0.003 |
| Urban 5 (highest)                                  | 12.8%                         | 15.6%                 | 0.081 | 15.1%            | 15.1%       | 0     |
| <b><u>Immigration Category</u></b>                 |                               |                       |       |                  |             |       |
| </= 10 years                                       | 1.5%                          | 2.2%                  | 0.048 | 1.9%             | 2.0%        | 0.009 |
| Long-term resident (> 10 years)                    | 4.2%                          | 6.6%                  | 0.103 | 6.2%             | 6.2%        | 0     |
| Non-immigrant                                      | 94.4%                         | 91.2%                 | 0.115 | 91.9%            | 91.8%       | 0.004 |
| <b><u>Type of Lung Cancer</u></b>                  |                               |                       |       |                  |             |       |
| NSCLC: Adenocarcinoma                              | 42.2%                         | 49.4%                 | 0.144 | 47.8%            | 48.1%       | 0.004 |
| NSCLC: Squamous cell carcinoma                     | 20.5%                         | 13.9%                 | 0.185 | 15.2%            | 15.1%       | 0.002 |
| NSCLC: Large cell carcinoma                        | 2.6%                          | 2.7%                  | 0.009 | 2.7%             | 2.7%        | 0     |
| NSCLC: Adenosquamous                               | 0.7%                          | 0.6%                  | 0.010 | 0.6%             | 0.6%        | 0     |
| NSCLC: Not otherwise specified                     | 13.6%                         | 14.2%                 | 0.019 | 14.1%            | 14.1%       | 0     |
| SCLC                                               | 11.7%                         | 10.4%                 | 0.041 | 10.8%            | 10.6%       | 0.006 |
| Unspecified                                        | 8.8%                          | 8.8%                  | 0.001 | 8.7%             | 8.8%        | 0.002 |
| <b><u>Comorbidities</u></b>                        |                               |                       |       |                  |             |       |
| Asthma                                             | 9.9%                          | 7.9%                  | 0.072 | 8.3%             | 8.3%        | 0.002 |
| Congestive heart failure                           | 9.7%                          | 7.5%                  | 0.084 | 7.9%             | 7.9%        | 0     |
| Dementia                                           | 2.8%                          | 3.7%                  | 0.049 | 3.5%             | 3.5%        | 0.001 |
| Diabetes                                           | 23.3%                         | 24.8%                 | 0.034 | 2.5%             | 2.5%        | 0.002 |
| Previous pneumonia                                 | 24.3%                         | 18.5%                 | 0.146 | 19.6%            | 19.5%       | 0.001 |
| Cancer in the previous 5 years                     | 6.6%                          | 9.1%                  | 0.086 | 8.4%             | 8.6%        | 0.006 |
| <b><u>Previous Healthcare Utilization</u></b>      |                               |                       |       |                  |             |       |
| <b><u>Rate of primary care visits per year</u></b> |                               |                       |       |                  |             |       |
| 5 or more                                          | 31.3%                         | 34.0%                 | 0.056 | 33.5%            | 33.5%       | 0.001 |
| Between 2 and 5                                    | 37.0%                         | 38.1%                 | 0.023 | 37.9%            | 37.9%       | 0     |
| 2 or less                                          | 24.9%                         | 22.3%                 | 0.062 | 22.8%            | 22.8%       | 0.001 |
| 0                                                  | 6.7%                          | 5.6%                  | 0.047 | 5.8%             | 5.8%        | 0.003 |
| Specialist care                                    | 34.7%                         | 36.4%                 | 0.035 | 36.1%            | 36.1%       | 0.001 |

Abbreviations: NSCLC = Non-small cell lung cancer, SCLC = small cell lung cancer, SMD = standardized mean difference, SD=standard deviation

**Table S4:** Balance in characteristics of individuals with previously diagnosed and undiagnosed COPD prior to and after inverse propensity score weighting (IPW)

|                                                    | Unweighted                       |                                               |       | Weighted            |            |       |
|----------------------------------------------------|----------------------------------|-----------------------------------------------|-------|---------------------|------------|-------|
|                                                    | Undiagnosed<br>COPD<br>(n=8,843) | Previously<br>diagnosed<br>COPD<br>(n=38,894) | SMD   | Undiagnosed<br>COPD | No COPD    | SMD   |
| <b><u>Demographics</u></b>                         |                                  |                                               |       |                     |            |       |
| Age, mean (SD)                                     | 71.9 (9.4)                       | 71.9 (9.4)                                    | 0.334 | 71.6 (10.0)         | 71.3 (9.4) | 0.026 |
| Sex, % male                                        | 51.5%                            | 51.5%                                         | 0.065 | 52.2%               | 52.1%      | 0.004 |
| <b><u>Rurality/Income Quintile</u></b>             |                                  |                                               |       |                     |            |       |
| Rural                                              | 16.5%                            | 16.5%                                         | 0.027 | 16.2%               | 16.3%      | 0.003 |
| Urban 1 (lowest)                                   | 23.3%                            | 23.3%                                         | 0.046 | 22.5%               | 22.9%      | 0.008 |
| Urban 2                                            | 19.6%                            | 19.6%                                         | 0.017 | 19.9%               | 19.8%      | 0.004 |
| Urban 3                                            | 15.8%                            | 15.8%                                         | 0.002 | 16.2%               | 15.8%      | 0.010 |
| Urban 4                                            | 13.4%                            | 13.4%                                         | 0.029 | 13.6%               | 13.6%      | 0     |
| Urban 5 (highest)                                  | 11.4%                            | 11.4%                                         | 0.043 | 11.6%               | 11.6%      | 0.002 |
| <b><u>Immigration Category</u></b>                 |                                  |                                               |       |                     |            |       |
| <= 10 years                                        | 0.4%                             | 0.4%                                          | 0.145 | 0.5%                | 0.6%       | 0.001 |
| Long-term resident (> 10 years)                    | 2.7%                             | 2.7%                                          | 0.089 | 2.9%                | 3.0%       | 0.001 |
| Non-immigrant                                      | 97.0%                            | 97.0%                                         | 0.141 | 96.5%               | 96.5%      | 0.001 |
| <b><u>Type of Lung Cancer</u></b>                  |                                  |                                               |       |                     |            |       |
| NSCLC: Adenocarcinoma                              | 42.2%                            | 35.5%                                         | 0.139 | 37.5%               | 36.8%      | 0.014 |
| NSCLC: Squamous cell carcinoma                     | 20.5%                            | 21.9%                                         | 0.414 | 20.9%               | 21.6%      | 0.017 |
| NSCLC: Large cell carcinoma                        | 2.6%                             | 2.4%                                          | 0.008 | 2.6%                | 2.5%       | 0.012 |
| NSCLC: Adenosquamous                               | 0.7%                             | 0.5%                                          | 0.021 | 0.6%                | 0.6%       | 0.004 |
| NSCLC: Not otherwise specified                     | 13.6%                            | 14.2%                                         | 0.017 | 14.0%               | 14.1%      | 0.001 |
| SCLC                                               | 11.7%                            | 12.7%                                         | 0.032 | 12.4%               | 12.5%      | 0.003 |
| Unspecified                                        | 8.8%                             | 12.7%                                         | 0.119 | 12.0%               | 12.0%      | 0.001 |
| <b><u>Comorbidities</u></b>                        |                                  |                                               |       |                     |            |       |
| Asthma                                             | 9.9%                             | 26.1%                                         | 0.385 | 22.7%               | 23.1%      | 0.009 |
| Congestive heart failure                           | 9.7%                             | 17.7%                                         | 0.217 | 16.2%               | 16.2%      | 0     |
| Dementia                                           | 2.8%                             | 5.5%                                          | 0.125 | 5.3%                | 5.0%       | 0.012 |
| Diabetes                                           | 23.3%                            | 29.4%                                         | 0.136 | 29.0%               | 28.4%      | 0.015 |
| Previous pneumonia                                 | 24.3%                            | 32.5%                                         | 0.177 | 30.0%               | 30.9%      | 0.019 |
| Cancer in the previous 5 years                     | 6.6%                             | 8.7%                                          | 0.074 | 8.6%                | 8.3%       | 0.010 |
| <b><u>Previous Healthcare Utilization</u></b>      |                                  |                                               |       |                     |            |       |
| <b><u>Rate of primary care visits per year</u></b> |                                  |                                               |       |                     |            |       |
| 5 or more                                          | 31.3%                            | 50.6%                                         | 0.386 | 47.4%               | 47.1%      | 0.007 |
| Between 2 and 5                                    | 37.0%                            | 35.1%                                         | 0.041 | 35.4%               | 35.5%      | 0.001 |
| 2 or less                                          | 24.9%                            | 12.6%                                         | 0.346 | 14.7%               | 14.9%      | 0.007 |
| 0                                                  | 6.7%                             | 1.7%                                          | 0.312 | 2.5%                | 2.6%       | 0.004 |
| Specialist care                                    | 34.7%                            | 49.7%                                         | 0.301 | 47.8%               | 47.0%      | 0.015 |

Abbreviations: NSCLC = Non-small cell lung cancer, SCLC = small cell lung cancer, SMD = standardized mean difference, SD=standard deviation

**Table S5:** Sensitivity Analysis - Balance in characteristics of individuals with COPD and without COPD prior to and after inverse propensity score weighting (IPW)

|                                                    | Unweighted         |                       |       | Weighted   |             |       |
|----------------------------------------------------|--------------------|-----------------------|-------|------------|-------------|-------|
|                                                    | COPD<br>(n=25,941) | No COPD<br>(n=52,051) | SMD   | COPD       | No COPD     | SMD   |
| <b><u>Demographics</u></b>                         |                    |                       |       |            |             |       |
| Age, mean (SD)                                     | 72.6 (9.0)         | 69.3 (11.0)           | 0.316 | 71.0 (9.1) | 70.6 (11.0) | 0.044 |
| Sex, % male                                        | 51.6%              | 51.0%                 | 0.010 | 52.1%      | 51.3%       | 0.015 |
| <b><u>Rurality/Income Quintile</u></b>             |                    |                       |       |            |             |       |
| Rural                                              | 16.3%              | 14.6%                 | 0.049 | 15.3%      | 15.1%       | 0.005 |
| Urban 1 (lowest)                                   | 24.5%              | 18.9%                 | 0.138 | 20.9%      | 20.9%       | 0.001 |
| Urban 2                                            | 19.7%              | 19.0%                 | 0.018 | 19.3%      | 19.2%       | 0.002 |
| Urban 3                                            | 15.8%              | 16.8%                 | 0.026 | 16.4%      | 16.4%       | 0.001 |
| Urban 4                                            | 13.0%              | 15.9%                 | 0.083 | 14.8%      | 14.9%       | 0.004 |
| Urban 5 (highest)                                  | 10.8%              | 14.9%                 | 0.121 | 13.4%      | 13.5%       | 0.004 |
| <b><u>Immigration Category</u></b>                 |                    |                       |       |            |             |       |
| <= 10 years                                        | 0.3%               | 1.7%                  | 0.126 | 1.0%       | 1.3%        | 0.021 |
| Long-term resident (> 10 years)                    | 2.3%               | 5.8%                  | 0.168 | 4.4%       | 4.6%        | 0.013 |
| Non-immigrant                                      | 97.4%              | 92.4%                 | 0.210 | 94.6%      | 94.1%       | 0.022 |
| <b><u>Type of Lung Cancer</u></b>                  |                    |                       |       |            |             |       |
| NSCLC: Adenocarcinoma                              | 33.0%              | 47.2%                 | 0.288 | 42.6%      | 42.6%       | 0.001 |
| NSCLC: Squamous cell carcinoma                     | 23.4%              | 15.1%                 | 0.215 | 18.0%      | 17.9%       | 0.003 |
| NSCLC: Large cell carcinoma                        | 2.3%               | 2.7%                  | 0.023 | 2.6%       | 2.6%        | 0.002 |
| NSCLC: Adenosquamous                               | 0.5%               | 0.6%                  | 0.016 | 0.6%       | 0.6%        | 0     |
| NSCLC: Not otherwise specified                     | 14.1%              | 14.2%                 | 0.002 | 13.9%      | 14.1%       | 0.005 |
| SCLC                                               | 12.4%              | 11.1%                 | 0.039 | 11.4%      | 11.5%       | 0.003 |
| Unspecified                                        | 14.3%              | 9.0%                  | 0.172 | 10.9%      | 10.8%       | 0.004 |
| <b><u>Comorbidities</u></b>                        |                    |                       |       |            |             |       |
| Asthma                                             | 31.0%              | 10.0%                 | 0.559 | 17.0%      | 16.8%       | 0.006 |
| Congestive heart failure                           | 21.5%              | 8.1%                  | 0.404 | 12.9%      | 12.7%       | 0.005 |
| Dementia                                           | 6.1%               | 3.8%                  | 0.107 | 4.8%       | 4.7%        | 0.009 |
| Diabetes                                           | 30.7%              | 25.3%                 | 0.121 | 27.7%      | 27.1%       | 0.014 |
| Previous pneumonia                                 | 37.4%              | 19.5%                 | 0.413 | 25.6%      | 25.3%       | 0.005 |
| Cancer in the previous 5 years                     | 8.5%               | 9.1%                  | 0.022 | 9.1%       | 8.9%        | 0.006 |
| <b><u>Previous Healthcare Utilization</u></b>      |                    |                       |       |            |             |       |
| <b><u>Rate of primary care visits per year</u></b> |                    |                       |       |            |             |       |
| 5 or more                                          | 54.5%              | 36.2%                 | 0.370 | 43.0%      | 42.4%       | 0.013 |
| Between 2 and 5                                    | 33.2%              | 38.3%                 | 0.104 | 37.0%      | 36.7%       | 0.006 |
| 2 or less                                          | 10.7%              | 20.8%                 | 0.267 | 16.8%      | 17.3%       | 0.013 |
| 0                                                  | 1.6%               | 4.7%                  | 0.165 | 3.2%       | 3.6%        | 0.022 |
| Specialist care                                    | 53.1%              | 38.0%                 | 0.305 | 44.1%      | 43.2%       | 0.018 |

Abbreviations: NSCLC = Non-small cell lung cancer, SCLC = small cell lung cancer, SMD = standardized mean difference, SD=standard deviation
